# Supplementary material for: Fragile Genomic Sites Are Associated with Origins of Replication
Source: PubMed Central journal article supplement — Genome Biol Evol. 2009 Sep 9;1:350–63. doi: 10.1093/gbe/evp034 (PMC2817429; doi:10.1093/gbe/evp034), 2009-09-09

## Supplemental Figures

**Figure S1:** Defining intrachromosomal breakpoints. **A:** For *S. cerevisiae* intergenic regions flanked by *K. waltii* homologs located on the same *K. waltii* chromosome, the number of genes between the *K. waltii* homologs in their native *K. waltii* gene order was counted. **B:** The distribution of the number of genes between the *K. waltii* homologs flanking an *S. cerevisiae* intergenic region. The inset shows the histogram for *S. cerevisiae* intergenic regions flanked by *K. waltii* homologs located 10 or more genes apart. Intergenic regions with *K. waltii* homologs 20 genes (red line) or more apart were called as intrachromosomal breakpoints. The data for Wolfe *S. cerevisiae* – *K. waltii* intergenic regions are shown. Similar results were found for Kellis *S. cerevisiae* – *K. waltii* as well as for Wolfe *S. cerevisiae* – Ancestor and Wolfe *K. waltii* – Ancestor.

**Figure S2:** Distances between adjacent breakpoints. For the enrichment and regression analyses, breakpoints within one bin are treated as a single breakpoint and therefore clustered breakpoints become a single event. To decide on the optimal bin size to ensure that clustered breakpoints end up in the same bin, we plotted the distribution of distances between adjacent breakpoints. The histogram for the Wolfe *S. cerevisiae* – *K. waltii* genome comparison is shown here. Similar histograms were generated for the other genome comparisons. From these histograms, we noted a predominance of breakpoints within 5 kb of each other and decided to use a bin size of 5 kb (red line) for the enrichment and regression analyses. Over 80% of the breakpoints found by any genome comparison that lie within 5 kb of one another end up in the same bin when 5 kb bins are used.

**Figure S3:** Size distribution of all *S. cerevisiae* intergenic regions and those bearing a breakpoint for the Wolfe *S. cerevisiae* – *K. waltii* genome comparison. The inset shows the histogram for intergenic sizes of 12 kb or greater. Similar histograms were generated for Kellis *S. cerevisiae* – *K. waltii* and Wolfe *S. cerevisiae* – Ancestor comparisons. From both the Wolfe and Kellis *S. cerevisiae* – *K. waltii* plots, we noticed that above 17 kb (the red line on the inset), all or all but one intergenic regions bear breakpoints. Thus, to exclude the largest intergenic regions and hence also the largest breakpoints, we used a cutoff of 17 kb for the minimal endpoint distance analysis. A similar histogram was created for the Wolfe *K. waltii* - Ancestor genome comparison and a 14 kb cutoff was deemed appropriate.

## Supplemental Tables

**Table S1:** Numbers of genes for *S. cerevisiae*, *K. waltii*, and the Ancestor and the number of homologs between compared species for the Kellis dataset (Kellis et al. 2004) and the Wolfe dataset (Byrne et al. 2005) (<http://wolfe.gen.tcd.ie/ygob/>). For the list of genes used see Resources and Datasets.

|                                                            | Kellis dataset | Wolfe dataset |
|------------------------------------------------------------|----------------|---------------|
| <i>S. cerevisiae</i> genes                                 | 6328           | 5615          |
| <i>K. waltii</i> genes                                     | 5060           | 5060          |
| Ancestor genes                                             | NA             | 4699          |
| <i>S. cerevisiae</i> genes with a <i>K. waltii</i> homolog | 5146           | 4906          |
| <i>S. cerevisiae</i> genes with an Ancestor homolog        | NA             | 5105          |
| <i>K. waltii</i> genes with an Ancestor homolog            | NA             | 4424          |

**Table S2:** Genomic features used to search for correlations with breakpoints. The features were derived from: <sup>1</sup>SGD (<http://www.yeastgenome.org/>); <sup>2</sup>Borde et al. (2004); <sup>3</sup>Nieduszynski et al. (2007); <sup>4</sup>this work; <sup>5</sup>McCune et al. (2008); <sup>6</sup>Kellis et al. (2004). Telomeric repeats are those features annotated in SGD as “repeat\_family” while LTRs are features denoted as “repeat\_region”. Tys comprise features listed as either “transposable\_element” or “transposable\_element\_gene” in SGD. Therefore, full Tys may be annotated as a complete feature or as multiple separate genes. Ribosomal protein genes are named rpl\*, rps\*, mrlp\*, or mrsp\* in SGD and include both the cytoplasmic and mitochondrial small and large ribosomal subunit genes. The list of all genomic features used is provided in Resources and Datasets.

| Genomic Feature                                                 | Total Number |
|-----------------------------------------------------------------|--------------|
| <i>S. cerevisiae</i> centromeres <sup>1</sup>                   | 16           |
| <i>S. cerevisiae</i> telomeres <sup>1</sup>                     | 32           |
| <i>S. cerevisiae</i> telomeric repeats <sup>1</sup>             | 100          |
| <i>S. cerevisiae</i> snoRNAs <sup>1</sup>                       | 77           |
| <i>S. cerevisiae</i> snRNAs <sup>1</sup>                        | 6            |
| <i>S. cerevisiae</i> ribosomal genes <sup>1</sup>               | 183          |
| <i>S. cerevisiae</i> Spo11 hotspots <sup>2</sup>                | 574          |
| <i>S. cerevisiae</i> tRNAs <sup>1</sup>                         | 275          |
| <i>S. cerevisiae</i> Tys <sup>1</sup>                           | 139          |
| <i>S. cerevisiae</i> LTRs <sup>1</sup>                          | 392          |
| <i>S. cerevisiae</i> OriDB ARSs <sup>3</sup>                    | 732          |
| Confirmed                                                       | 326          |
| Likely                                                          | 244          |
| Dubious                                                         | 165          |
| <i>S. cerevisiae</i> high confidence ARSs (hcARSs) <sup>4</sup> | 411          |
| <i>S. cerevisiae</i> McCune origins <sup>5</sup>                | 200          |
| NonCDR (early firing)                                           | 77           |
| CDR (late firing)                                               | 123          |
| Rad53 unregulated (early firing)                                | 101          |
| Rad53 regulated (late firing)                                   | 99           |
| <i>K. waltii</i> centromeres <sup>6</sup>                       | 8            |
| <i>K. waltii</i> tRNAs <sup>4</sup>                             | 217          |

**Table S3:** Number and types of intergenic regions among *S. cerevisiae*, *K. waltii*, and the Ancestor. The type of intergenic region is determined according to if and how the flanking genes overlap irrespective of reading frame or coding strand. Type A: the flanking genes overlap such that the first gene ends before the second. Type B: the flanking genes overlap such that the first gene ends after the second. Type C: the flanking genes do not overlap. Only Type C intergenic regions were interrogated as potential breakpoints in this study. Counts for the three types of intergenic regions are given for intergenic regions found for *S. cerevisiae* – *K. waltii*, *S. cerevisiae* – Ancestor, and *K. waltii* – Ancestor for the Kellis and Wolfe datasets.

| Intergenic Type                                                                     | Kellis<br><i>S. cerevisiae</i> -<br><i>K. waltii</i> | Wolfe<br><i>S. cerevisiae</i> -<br><i>K. waltii</i> | Wolfe<br><i>S. cerevisiae</i> -<br>Ancestor | Wolfe<br><i>K. waltii</i> -<br>Ancestor |
|-------------------------------------------------------------------------------------|------------------------------------------------------|-----------------------------------------------------|---------------------------------------------|-----------------------------------------|
| A  | 65                                                   | 9                                                   | 10                                          | 46                                      |
| B  | 2                                                    | 0                                                   | 0                                           | 16                                      |
| C  | 5063                                                 | 4881                                                | 5079                                        | 4354                                    |

**Table S4:** Literature references from which 442 breakpoints were curated. Plain-text references (seven papers, 147 breakpoints) report evolutionary breakpoints among *sensu stricto* yeast. References in bold (22 papers, 295 breakpoints) represent those in which the authors generated the breakpoints experimentally. Note that in the HO break assay (VanHulle et al. 2007), though the site of the HO break is engineered and known, the site to which the HO break repairs represents a biologically determined break and repair event.

|                                 |                                  |                                  |                                 |
|---------------------------------|----------------------------------|----------------------------------|---------------------------------|
| <b>Admire et al. (2006)</b>     | Dunn et al. (2005)               | Kellis et al. (2003)             | Rachidi et al. (1999)           |
| <b>Aladjem et al. (1988)</b>    | Fischer et al. (2000)            | <b>Koszul et al. (2004)</b>      | <b>Schacherer et al. (2004)</b> |
| <b>Argueso et al. (2008)</b>    | <b>Gresham et al. (2008)</b>     | <b>Lemoine et al. (2005)</b>     | <b>Schacherer et al. (2005)</b> |
| Bond et al. (2004)              | Hall et al. (2005)               | <b>Lemoine et al. (2008)</b>     | <b>Schacherer et al. (2007)</b> |
| <b>Brown et al. (1998)</b>      | <b>Huang and Koshland (2003)</b> | <b>Maxwell and Curcio (2007)</b> | <b>Tourrette et al. (2007)</b>  |
| <b>Chen and Kolodner (1999)</b> | <b>Hwang et al. (2008)</b>       | <b>Payen et al. (2008)</b>       | <b>Umezumi et al. (2002)</b>    |
| <b>Degtyareva et al. (2008)</b> | <b>James et al. (2008)</b>       | Perez-Ortiz et al. (2002)        | <b>VanHulle et al. (2007)</b>   |
| <b>Dunham et al. (2002)</b>     |                                  |                                  |                                 |

**Table S5:** Number of breakpoints identified for each set of compared genomes. The total numbers of intergenic regions for the compared genomes are given. The subset of intergenic regions bearing each type of breakpoint is subsequently shown followed by the total number of breaks for each genome comparison. Numbers in parentheses represent values used for the minimal endpoint distance analysis. Lists of breakpoints for each dataset are provided in Resources and Datasets.

|                        | Kellis<br><i>S. cerevisiae</i> –<br><i>K. waltii</i> | Wolfe<br><i>S. cerevisiae</i> –<br><i>K. waltii</i> | Wolfe<br><i>S. cerevisiae</i> -<br>Ancestor | Wolfe<br><i>K. waltii</i> -<br>Ancestor |
|------------------------|------------------------------------------------------|-----------------------------------------------------|---------------------------------------------|-----------------------------------------|
| Intergenic Regions     | 5063 (5059)                                          | 4881 (4875)                                         | 5079 (5077)                                 | 4354 (4345)                             |
| Interchr Breaks        | 827 (824)                                            | 496 (491)                                           | 139 (138)                                   | 153 (145)                               |
| Intrachr Breaks        | 162 (161)                                            | 114 (114)                                           | 57 (57)                                     | 40 (39)                                 |
| Tandem<br>Duplications | 40 (40)                                              | 0 (0)                                               | 0 (0)                                       | 0 (0)                                   |
| Gene Order<br>Changes  | 123 (123)                                            | 108 (108)                                           | 85 (85)                                     | 76 (76)                                 |
| Total Breaks           | 1152 (1148)                                          | 718 (713)                                           | 281 (280)                                   | 269 (260)                               |

**Table S6:** Enrichment analysis of *S. cerevisiae* – *K. waltii* breakpoints and genomic features. Features and breakpoints were assigned a 5 kb bin by midpoint. *P*-values shown reflect the probability of seeing at least the observed co-localization of features and breakpoints under a hypergeometric distribution. Significant *P*-values ( $P < 0.05$ ) are highlighted in yellow, and the entire box is highlighted in pink for those significant after a Bonferroni correction ( $P < 0.0025$ ). Ty features used in this analysis are redundant: a single full length Ty could be represented as both one feature and as the individual genes comprising the Ty. As a result, a breakpoint falling inside a complete Ty may be placed in the same bin as the complete feature but will only be in the same bin as one of the Ty genes. This redundancy reduces the significance of the correlation between Tys and breakpoints. LTRs better represent the location of Ty elements than full Ty elements for this analysis.

| Genomic Feature                  | Total number of bins with feature | Number of bins with feature and a Kellis breakpoint | Kellis <i>P</i> -value | Number of bins with feature and a Wolfe breakpoint | Wolfe <i>P</i> -value |
|----------------------------------|-----------------------------------|-----------------------------------------------------|------------------------|----------------------------------------------------|-----------------------|
| Centromeres                      | 16                                | 6                                                   | 0.5848                 | 5                                                  | 0.3925                |
| Ribosomal protein genes          | 170                               | 60                                                  | 0.7320                 | 45                                                 | 0.4279                |
| snoRNAs                          | 60                                | 23                                                  | 0.4779                 | 20                                                 | 0.1103                |
| snRNAs                           | 5                                 | 1                                                   | 0.9028                 | 0                                                  | 1.0000                |
| Spo11 hotspots                   | 409                               | 139                                                 | 0.9392                 | 104                                                | 0.5628                |
| Telomeres                        | 32                                | 6                                                   | 0.9934                 | 0                                                  | 1.0000                |
| Telomeric repeats                | 51                                | 19                                                  | 0.5517                 | 2                                                  | 1.000                 |
| tRNAs                            | 254                               | 125                                                 | <10 <sup>-4</sup>      | 105                                                | <10 <sup>-8</sup>     |
| Tys                              | 65                                | 20                                                  | 0.8903                 | 15                                                 | 0.7282                |
| LTRs                             | 255                               | 110                                                 | 0.0236                 | 87                                                 | 0.0009                |
| hcARSs                           | 398                               | 185                                                 | <10 <sup>-4</sup>      | 123                                                | 0.0055                |
| OriDB ARSs                       | 699                               | 289                                                 | 0.0045                 | 182                                                | 0.4033                |
| Confirmed                        | 316                               | 144                                                 | 0.0007                 | 93                                                 | 0.0572                |
| Likely                           | 241                               | 101                                                 | 0.0657                 | 57                                                 | 0.7926                |
| Dubious                          | 163                               | 51                                                  | 0.9574                 | 38                                                 | 0.7851                |
| McCune origins                   | 200                               | 90                                                  | 0.0113                 | 70                                                 | 0.0013                |
| nonCDR (early firing)            | 77                                | 38                                                  | 0.0182                 | 28                                                 | 0.0224                |
| CDR (late firing)                | 123                               | 52                                                  | 0.1374                 | 42                                                 | 0.0192                |
| Rad53 unregulated (early firing) | 101                               | 52                                                  | 0.0020                 | 41                                                 | 0.0005                |
| Rad53 regulated (late firing)    | 99                                | 38                                                  | 0.4423                 | 29                                                 | 0.2288                |

**Table S7:** Simulation analysis using minimal endpoint and midpoint measures for *S. cerevisiae* – *K. waltii* breakpoints and genomic features. Simulations were not attempted for features restricted to particular regions of the genome (centromeres, telomeres) or for rare features (snRNAs). <sup>1</sup>The number of breakpoints with a feature within 1 kb. <sup>2</sup>The mean number of breakpoints with a feature within 1 kb from 10,000 sets of simulated breakpoints. <sup>3</sup>*P*-values were determined by summing the number of simulations in which the number of breakpoints within 1 kb of a feature was equal to or greater than in the real data and dividing by the total number of simulations (10,000). Significant *P*-values ( $P < 0.05$ ) are highlighted in yellow, and the entire box is highlighted in pink for those significant after a Bonferroni correction ( $P < 0.0029$ ).

| Feature                          | Minimal Endpoint Distance Measure       |                   |                                  |                                        |       |                     | Midpoint Distance Measure               |       |                     |                                        |      |                     |
|----------------------------------|-----------------------------------------|-------------------|----------------------------------|----------------------------------------|-------|---------------------|-----------------------------------------|-------|---------------------|----------------------------------------|------|---------------------|
|                                  | Kellis <i>Scer</i> - <i>Kwal</i> /break |                   |                                  | Wolfe <i>Scer</i> - <i>Kwal</i> /break |       |                     | Kellis <i>Scer</i> - <i>Kwal</i> /break |       |                     | Wolfe <i>Scer</i> - <i>Kwal</i> /break |      |                     |
|                                  | Observed<br>≤ 1kb <sup>1</sup>          | Mean <sup>2</sup> | <i>P</i> -<br>value <sup>3</sup> | Observed<br>≤ 1kb                      | Mean  | <i>P</i> -<br>value | Observed<br>≤ 1kb                       | Mean  | <i>P</i> -<br>value | Observed<br>≤ 1kb                      | Mean | <i>P</i> -<br>value |
| Breakpoints                      | 322                                     | 327.6             | 0.6260                           | 111                                    | 125.8 | 0.8987              | 41                                      | 109.9 | 1.0000              | 12                                     | 42.7 | 1.0000              |
| Ribosomal protein genes          | 69                                      | 78.3              | 0.8868                           | 48                                     | 50.0  | 0.6367              | 51                                      | 62.8  | 0.9496              | 37                                     | 40.6 | 0.7500              |
| snoRNAs                          | 21                                      | 19.5              | 0.4021                           | 18                                     | 12.4  | 0.0743              | 17                                      | 14.8  | 0.3055              | 13                                     | 9    | 0.1043              |
| Spo11 hotspots                   | 169                                     | 193.1             | 0.9573                           | 118                                    | 124.6 | 0.7503              | 113                                     | 140.1 | 0.9908              | 83                                     | 90.9 | 0.8263              |
| tRNAs                            | 127                                     | 66.8              | 0.0001                           | 107                                    | 41.9  | 0.0003              | 77                                      | 40.9  | 0.0001              | 65                                     | 25.6 | 0.0001              |
| Tys                              | 22                                      | 10.7              | 0.0003                           | 17                                     | 6.5   | <10 <sup>-4</sup>   | 16                                      | 7.7   | 0.0016              | 15                                     | 4.9  | 0.0001              |
| LTRs                             | 98                                      | 45.5              | 0.0003                           | 76                                     | 27.5  | <10 <sup>-4</sup>   | 59                                      | 25.7  | 0.0004              | 42                                     | 14.7 | <10 <sup>-4</sup>   |
| hcARSSs                          | 204                                     | 136.9             | <10 <sup>-4</sup>                | 130                                    | 83.5  | 0.0002              | 124                                     | 83.8  | 0.0001              | 76                                     | 50.4 | 0.0002              |
| OriDB ARSSs                      | 347                                     | 244.8             | <10 <sup>-4</sup>                | 210                                    | 147.9 | 0.0002              | 180                                     | 135.9 | 0.0002              | 92                                     | 78.9 | 0.0532              |
| Confirmed                        | 142                                     | 89.6              | 0.0002                           | 90                                     | 55.2  | <10 <sup>-4</sup>   | 92                                      | 62.2  | 0.0001              | 52                                     | 36.1 | 0.0026              |
| Likely                           | 144                                     | 95.3              | 0.0005                           | 81                                     | 55.3  | 0.0007              | 65                                      | 45.9  | 0.0016              | 26                                     | 25.5 | 0.4872              |
| Dubious                          | 78                                      | 71.0              | 0.2040                           | 54                                     | 44.5  | 0.0794              | 23                                      | 27.9  | 0.8754              | 14                                     | 17.3 | 0.8344              |
| McCune origins                   | 97                                      | 72.6              | 0.0011                           | 73                                     | 47.1  | 0.0003              | 59                                      | 42.8  | 0.0043              | 38                                     | 26.5 | 0.0109              |
| nonCDR (early firing)            | 51                                      | 27.9              | 0.0003                           | 36                                     | 18.1  | 0.0004              | 32                                      | 17.6  | 0.0005              | 20                                     | 10.7 | 0.0050              |
| CDR (late firing)                | 46                                      | 44.6              | 0.4355                           | 37                                     | 29.1  | 0.0729              | 27                                      | 25.3  | 0.3897              | 18                                     | 15.7 | 0.3045              |
| Rad53 unregulated (early firing) | 57                                      | 35.2              | 0.0002                           | 44                                     | 22.6  | 0.0001              | 32                                      | 19.5  | 0.0021              | 21                                     | 12.2 | 0.0089              |
| Rad53 regulated (late firing)    | 40                                      | 37.5              | 0.3735                           | 29                                     | 24.6  | 0.2005              | 27                                      | 23.2  | 0.2192              | 17                                     | 14.3 | 0.2606              |

**Table S8:** Enrichment and simulation analysis using minimal endpoint and midpoint measures for Wolfe *S. cerevisiae* – Ancestor breakpoints and genomic features. The Ancestor is an inferred ancestor of *S. cerevisiae* and *K. waltii*. Its gene content was determined by parsimony using eleven yeast genomes (Gordon et al. 2009). The Ancestor genome used in this work is a previous version based off of eight yeast genomes. For details see the legends for **Tables S6** and **S7**.

| Genomic Feature                  | Enrichment Test                   |                                            |                   | Minimal Endpoint Distance Measures Simulation Test |      |                   | Midpoint Distance Measures Simulation Test |      |                   |
|----------------------------------|-----------------------------------|--------------------------------------------|-------------------|----------------------------------------------------|------|-------------------|--------------------------------------------|------|-------------------|
|                                  | Total number of bins with feature | Number of bins with feature and breakpoint | <i>P</i> -value   | Observed ≤ 1kb                                     | Mean | <i>P</i> -value   | Observed ≤ 1kb                             | Mean | <i>P</i> -value   |
| Breakpoints                      | NA                                | NA                                         | NA                | 34                                                 | 28.5 | 0.2105            | 8                                          | 10.6 | 0.7949            |
| Centromeres                      | 16                                | 2                                          | 0.5121            | NA                                                 | NA   | NA                | NA                                         | NA   | NA                |
| Ribosomal protein genes          | 170                               | 16                                         | 0.7202            | 16                                                 | 21.6 | 0.9209            | 13                                         | 17.7 | 0.9036            |
| snoRNAs                          | 60                                | 7                                          | 0.4430            | 6                                                  | 4.8  | 0.3525            | 4                                          | 3.7  | 0.5090            |
| snRNAs                           | 5                                 | 0                                          | 1.0000            | NA                                                 | NA   | NA                | NA                                         | NA   | NA                |
| Spo11 hotspots                   | 409                               | 40                                         | 0.7215            | 43                                                 | 48.6 | 0.8191            | 29                                         | 36   | 0.9057            |
| Telomeres                        | 32                                | 0                                          | 1.0000            | NA                                                 | NA   | NA                | NA                                         | NA   | NA                |
| Telomeric repeats                | 51                                | 0                                          | 1.0000            | NA                                                 | NA   | NA                | NA                                         | NA   | NA                |
| tRNAs                            | 254                               | 58                                         | <10 <sup>-9</sup> | 60                                                 | 16   | 0.0001            | 38                                         | 10.1 | 0.0002            |
| Tys                              | 65                                | 10                                         | 0.1363            | 12                                                 | 2.4  | 0.0002            | 10                                         | 1.9  | 0.0003            |
| LTRs                             | 255                               | 43                                         | 0.0006            | 43                                                 | 10.2 | <10 <sup>-4</sup> | 23                                         | 5.7  | <10 <sup>-4</sup> |
| hcARSs                           | 398                               | 57                                         | 0.0052            | 55                                                 | 31.1 | 0.0002            | 35                                         | 19.6 | 0.0007            |
| OriDB ARSs                       | 699                               | 77                                         | 0.3162            | 88                                                 | 55.8 | 0.0001            | 51                                         | 31.4 | 0.0004            |
| Confirmed                        | 316                               | 43                                         | 0.0355            | 37                                                 | 20.8 | 0.0007            | 24                                         | 14.5 | 0.0086            |
| Likely                           | 241                               | 26                                         | 0.4670            | 31                                                 | 20.4 | 0.0164            | 18                                         | 9.8  | 0.0092            |
| Dubious                          | 163                               | 11                                         | 0.9658            | 25                                                 | 17.3 | 0.0498            | 9                                          | 7.3  | 0.3049            |
| McCune origins                   | 200                               | 28                                         | 0.0616            | 28                                                 | 17.8 | 0.0114            | 16                                         | 10.5 | 0.0603            |
| nonCDR (early firing)            | 77                                | 18                                         | 0.0007            | 20                                                 | 6.9  | 0.0001            | 12                                         | 4.3  | 0.0008            |
| CDR (late firing)                | 123                               | 10                                         | 0.8483            | 8                                                  | 10.8 | 0.8512            | 4                                          | 6.2  | 0.8731            |
| Rad53 unregulated (early firing) | 101                               | 21                                         | 0.0013            | 10                                                 | 8.5  | 0.0009            | 12                                         | 4.9  | 0.0036            |
| Rad53 regulated (late firing)    | 99                                | 7                                          | 0.9093            | 8                                                  | 9.2  | 0.7037            | 4                                          | 5.6  | 0.8149            |



**Table S9:** Enrichment and simulation analysis using midpoint and minimal endpoint measures for Wolfe *K. waltii* – Ancestor breakpoints and genomic features. Only centromeres (Kellis et al. 2004) and tRNAs (this work) have been mapped in *K. waltii*. No data for origin locations in *K. waltii* are yet available. Significant *P*-values ( $P < 0.05$ ) are highlighted in yellow, and the entire box is highlighted in pink for those significant after a Bonferroni correction ( $P < 0.0250$ ).

| Genomic Feature | Enrichment Test                   |                                            |                 | Minimal Endpoint Distance Measures Simulation Test |      |                 | Midpoint Distance Measures Simulation Test |      |                 |
|-----------------|-----------------------------------|--------------------------------------------|-----------------|----------------------------------------------------|------|-----------------|--------------------------------------------|------|-----------------|
|                 | Total number of bins with feature | Number of bins with feature and breakpoint | <i>P</i> -value | Observed $\leq$ 1kb                                | Mean | <i>P</i> -value | Observed $\leq$ 1kb                        | Mean | <i>P</i> -value |
| Breakpoints     | NA                                | NA                                         | NA              | 62                                                 | 40.8 | 0.0012          | 8                                          | 15.7 | 0.9650          |
| Centromeres     | 8                                 | 1                                          | 0.6289          | NA                                                 | NA   | NA              | NA                                         | NA   | NA              |
| tRNAs           | 201                               | 35                                         | 0.0069          | 35                                                 | 14.6 | 0.0005          | 27                                         | 12.2 | 0.0005          |

**Table S10:** Enrichment and simulation analysis using minimal endpoint measures of evolutionarily-derived breakpoints from the literature with genomic features. For details see the legends in **Tables S6** and **S7**.

| Genomic Feature                  | Enrichment Test                   |                                              |                 | Minimal Endpoint Distance Measures Simulation Test |      |                 |
|----------------------------------|-----------------------------------|----------------------------------------------|-----------------|----------------------------------------------------|------|-----------------|
|                                  | Total number of bins with feature | Number of bins with feature and a breakpoint | <i>P</i> -value | Observed $\leq$ 1kb                                | Mean | <i>P</i> -value |
| Evolutionary literature breaks   | NA                                | NA                                           | NA              | 48                                                 | 47.9 | 0.9555          |
| Centromeres                      | 0                                 | 16                                           | 1.0000          | NA                                                 | NA   | NA              |
| Ribosomal protein genes          | 10                                | 170                                          | 0.3315          | 13                                                 | 10.4 | 0.2607          |
| snoRNAs                          | 0                                 | 60                                           | 1.0000          | 1                                                  | 3.3  | 0.9456          |
| snRNAs                           | 0                                 | 5                                            | 1.0000          | NA                                                 | NA   | NA              |
| Spo11 hotspots                   | 17                                | 409                                          | 0.8255          | 26                                                 | 25.0 | 0.4490          |
| Telomeres                        | 2                                 | 32                                           | 0.4762          | NA                                                 | NA   | NA              |
| Telomeric repeats                | 5                                 | 51                                           | 0.1050          | NA                                                 | NA   | NA              |
| tRNAs                            | 41                                | 254                                          | $<10^{-12}$     | 48                                                 | 13.2 | $<10^{-4}$      |
| Tys                              | 7                                 | 65                                           | 0.0392          | 8                                                  | 4.7  | 0.1254          |
| LTRs                             | 40                                | 255                                          | $<10^{-11}$     | 43                                                 | 13.8 | 0.0002          |
| hcARSs                           | 35                                | 398                                          | 0.0002          | 36                                                 | 25.0 | 0.0198          |
| OriDB ARSs                       | 53                                | 699                                          | 0.0002          | 55                                                 | 44.5 | 0.0518          |
| Confirmed                        | 28                                | 316                                          | 0.0011          | 26                                                 | 17.5 | 0.0411          |
| Likely                           | 20                                | 241                                          | 0.0128          | 24                                                 | 17.3 | 0.0921          |
| Dubious                          | 8                                 | 163                                          | 0.5660          | 13                                                 | 13.2 | 0.5483          |
| McCune origins                   | 19                                | 200                                          | 0.0036          | 21                                                 | 12.8 | 0.0269          |
| nonCDR (early firing)            | 10                                | 77                                           | 0.0040          | 9                                                  | 5.0  | 0.0871          |
| CDR (late firing)                | 9                                 | 123                                          | 0.1517          | 12                                                 | 7.8  | 0.1182          |
| Rad53 unregulated (early firing) | 14                                | 101                                          | 0.0003          | 15                                                 | 6.4  | 0.0059          |
| Rad53 regulated (late firing)    | 5                                 | 99                                           | 0.5497          | 6                                                  | 6.4  | 0.5926          |

**Table S11:** Enrichment and simulation analysis using minimal endpoint measures of experimentally derived breakpoints from the literature with genomic features. For details see the legends in **Tables S6** and **S7**.

| Genomic Feature                  | Enrichment Test                   |                                              |                 | Minimal Endpoint Distance Measures Simulation Test |      |                 |
|----------------------------------|-----------------------------------|----------------------------------------------|-----------------|----------------------------------------------------|------|-----------------|
|                                  | Total number of bins with feature | Number of bins with feature and a breakpoint | <i>P</i> -value | Observed $\leq$ 1kb                                | Mean | <i>P</i> -value |
| Experimental literature breaks   | NA                                | NA                                           | NA              | 164                                                | 164  | 0.9079          |
| Centromeres                      | 16                                | 2                                            | 0.3954          | NA                                                 | NA   | NA              |
| Ribosomal protein genes          | 170                               | 7                                            | 0.9924          | 10                                                 | 26   | 0.9971          |
| snoRNAs                          | 60                                | 7                                            | 0.2370          | 8                                                  | 8.7  | 0.5647          |
| snRNAs                           | 5                                 | 1                                            | 0.3560          | NA                                                 | NA   | NA              |
| Spo11 hotspots                   | 409                               | 29                                           | 0.8783          | 57                                                 | 59.3 | 0.5851          |
| Telomeres                        | 32                                | 2                                            | 0.7657          | NA                                                 | NA   | NA              |
| Telomeric repeats                | 51                                | 2                                            | 0.9378          | NA                                                 | NA   | NA              |
| tRNAs                            | 254                               | 49                                           | $<10^{-8}$      | 126                                                | 33.9 | $<10^{-4}$      |
| Tys                              | 65                                | 31                                           | $<10^{-16}$     | 59                                                 | 11.2 | 0.0011          |
| LTRs                             | 255                               | 72                                           | $<10^{-23}$     | 130                                                | 33.8 | $<10^{-4}$      |
| hcARSs                           | 398                               | 43                                           | 0.0408          | 88                                                 | 62.1 | 0.0060          |
| OriDB ARSs                       | 699                               | 68                                           | 0.0825          | 145                                                | 107  | 0.0007          |
| Confirmed                        | 316                               | 37                                           | 0.0187          | 70                                                 | 44.2 | 0.0036          |
| Likely                           | 241                               | 21                                           | 0.4688          | 52                                                 | 41.6 | 0.1434          |
| Dubious                          | 163                               | 14                                           | 0.5119          | 47                                                 | 33.1 | 0.0576          |
| McCune origins                   | 200                               | 19                                           | 0.3205          | 47                                                 | 32.4 | 0.0395          |
| nonCDR (early firing)            | 77                                | 9                                            | 0.1951          | 25                                                 | 12.4 | 0.0220          |
| CDR (late firing)                | 123                               | 10                                           | 0.5971          | 22                                                 | 20   | 0.3756          |
| Rad53 unregulated (early firing) | 101                               | 13                                           | 0.0774          | 40                                                 | 16.4 | 0.0001          |
| Rad53 regulated (late firing)    | 99                                | 6                                            | 0.8546          | 7                                                  | 16   | 0.9709          |

**Table S12:** Enrichment and simulation tests for co-localization of experimentally generated breakpoints with a subset of *S. cerevisiae* – *K. waltii* evolutionary breakpoints. The *S. cerevisiae* – *K. waltii* breakpoints used here consist of those having a given feature within 1 kb by minimal endpoint distance measure. Significant *P*-values ( $P < 0.05$ ) are highlighted in yellow, and the entire box is highlighted in pink for those significant after a Bonferroni correction ( $P < 0.01$ ). Bonferroni correction was applied to the Kellis and Wolfe data separately.

| Breakpoints (Kellis or Wolfe Scer-Kwal) within 1 kb of a Genomic Feature | Enrichment Test                      |                                                                 |                 | Simulation Test     |      |                 |
|--------------------------------------------------------------------------|--------------------------------------|-----------------------------------------------------------------|-----------------|---------------------|------|-----------------|
|                                                                          | Total number of bins with breakpoint | Number of bins with both an Scer-Kwal and an experimental break | <i>P</i> -value | Observed $\leq$ 1kb | Mean | <i>P</i> -value |
| All Kellis <i>S. cerevisiae</i> – <i>K. waltii</i> breaks                | 902                                  | 79                                                              | 0.3477          | 149                 | 125  | 0.0303          |
| Kellis breakpoints : tRNAs                                               | 124                                  | 31                                                              | $<10^{-8}$      | 74                  | 23.5 | $<10^{-4}$      |
| Kellis breakpoints : LTRs                                                | 98                                   | 31                                                              | $<10^{-10}$     | 69                  | 19.6 | 0.0001          |
| Kellis breakpoints : hcARSs                                              | 183                                  | 23                                                              | 0.0295          | 62                  | 32.1 | 0.0006          |
| Kellis breakpoints: McCune Rad53 unregulated origins (early firing)      | 52                                   | 10                                                              | 0.0098          | 26                  | 9.8  | 0.0031          |
| All Wolfe <i>S. cerevisiae</i> – <i>K. waltii</i> breaks                 | 621                                  | 53                                                              | 0.4810          | 106                 | 91.2 | 0.1054          |
| Wolfe breakpoints : tRNAs                                                | 106                                  | 28                                                              | $<10^{-7}$      | 62                  | 20.5 | $<10^{-4}$      |
| Wolfe breakpoints : LTRs                                                 | 76                                   | 25                                                              | $<10^{-9}$      | 55                  | 15.7 | 0.0001          |
| Wolfe breakpoints : hcARSs                                               | 125                                  | 18                                                              | 0.0149          | 37                  | 22.1 | 0.0246          |
| Wolfe breakpoints : McCune Rad53 unregulated origins (early firing)      | 42                                   | 10                                                              | 0.0019          | 24                  | 8.1  | 0.0032          |

**Table S13:** Enrichment analysis among various genomic features. Significant  $P$ -values ( $P < 0.05$ ) are highlighted in yellow, and the entire box is highlighted in pink for those significant after a Bonferroni correction ( $P < 0.0004$ ).

|                                  | Telomeres | Telomeric repeats | tRNAs     | Tys      | LTRs      | Centromere | Ribosomal protein genes | snoRNAs | snRNAs | Spo11 hotspots |
|----------------------------------|-----------|-------------------|-----------|----------|-----------|------------|-------------------------|---------|--------|----------------|
| Spo11 hotspots                   | 1.000     | 1.000             | 0.590     | 0.999    | 0.996     | 0.949      | 0.963                   | 0.706   | 0.604  | NA             |
| tRNAs                            | 1.000     | 0.997             | NA        | 2.41E-10 | 5.09E-125 | 1.000      | 0.989                   | 0.613   | 1.000  | 0.590          |
| Tys                              | 0.583     | 0.754             | 2.41E-10  | NA       | 1.30E-51  | 1.000      | 0.992                   | 1.000   | 1.000  | 0.999          |
| LTRs                             | 2.43E-04  | 2.43E-04          | 5.09E-125 | 1.30E-51 | NA        | 1.000      | 1.000                   | 0.617   | 0.427  | 0.996          |
| hcARSSs                          | 0.264     | 0.014             | 1.22E-07  | 0.968    | 6.21E-08  | 0.107      | 0.919                   | 0.396   | 1.000  | 0.979          |
| OriDB ARSSs                      | 8.98E-10  | 1.55E-15          | 0.003     | 0.520    | 3.72E-07  | 0.302      | 0.955                   | 0.865   | 1.000  | 0.948          |
| Confirmed                        | 0.006     | 4.61E-04          | 5.65E-04  | 0.763    | 2.01E-05  | 0.145      | 0.914                   | 0.815   | 1.000  | 0.974          |
| Likely                           | 1.46E-04  | 1.94E-08          | 0.304     | 0.901    | 0.009     | 0.483      | 0.733                   | 0.728   | 1.000  | 0.826          |
| Dubious                          | 0.004     | 0.052             | 0.256     | 0.028    | 0.031     | 1.000      | 0.900                   | 0.781   | 1.000  | 0.255          |
| McCune origins                   | 1.000     | 1.000             | 1.61E-07  | 0.915    | 5.34E-05  | 0.386      | 0.847                   | 0.560   | 1.000  | 0.798          |
| nonCDR (early firing)            | 1.000     | 1.000             | 5.83E-06  | 1.000    | 7.24E-04  | 0.090      | 0.976                   | 0.859   | 1.000  | 0.923          |
| CDR (late firing)                | 1.000     | 1.000             | 0.003     | 0.651    | 0.015     | 1.000      | 0.500                   | 0.363   | 1.000  | 0.516          |
| Rad53 unregulated (early firing) | 1.000     | 1.000             | 3.81E-08  | 0.515    | 6.14E-07  | 0.141      | 0.999                   | 0.723   | 1.000  | 0.832          |
| Rad53 regulated (late firing)    | 1.000     | 1.000             | 0.088     | 1.000    | 0.473     | 1.000      | 0.152                   | 0.447   | 1.000  | 0.620          |

**Table S14:** Regression analysis for the evolutionary breakpoints. Logistic regression analysis produced the following reduced model:  $\text{logit}(\text{breakpoint}) = c_{\text{tRNA}}(\text{tRNA}) + c_{\text{hcARS}}(\text{hcARS}) + c_{\text{telomeric repeat}}(\text{telomeric repeat}) + c_{\text{telomere}}(\text{telomere}) + c_{\text{intercept}}$ . The logit is  $\ln(\text{odds ratio of the probability of breakage})$ , where the probability of breakage is taken from a logistic distribution. The terms tRNA, hcARS, telomeric repeat, and telomere are a value (0, 1, 2, etc.) referring to the number of occurrences of that feature in a given 5 kb bin in the genome. <sup>1</sup>Coefficients in the model reflecting the effect of the genomic feature on the likelihood of a bin having a breakpoint. <sup>2</sup>The 95% confidence interval as determined by 1,000 bootstrap simulations. <sup>3</sup>The *P*-value of that term in the model. The Wolfe regression model does not find the telomere term to be significant. In both datasets, the most telomeric element negatively impacts breakpoint prediction. This negative correlation is seen because the most telomeric-proximal regions are bound by genes on only one side and thus by definition are not intergenic and are unable to bear breakpoints. The Wolfe model lacks the telomere term perhaps as a result of the Wolfe *S. cerevisiae* – *K. waltii* homology set excluding more telomeric genes than the Kellis dataset.

| Term                                                       | Coefficient <sup>1</sup> | 95% bootstrap confidence interval <sup>2</sup> | <i>P</i> -value in model <sup>3</sup> |
|------------------------------------------------------------|--------------------------|------------------------------------------------|---------------------------------------|
| <i>Kellis S. cerevisiae</i> – <i>K. waltii</i> breakpoints |                          |                                                |                                       |
| Intercept                                                  | -0.6396                  | [-0.7389, -0.5528]                             | < 10 <sup>-15</sup>                   |
| Telomeric repeats                                          | 0.7497                   | [0.3539, 1.259]                                | 0.0029                                |
| Telomeres                                                  | -2.6404                  | [-4.760, -1.390]                               | 0.0009                                |
| hcARSs                                                     | 0.3839                   | [0.1781, 0.5936]                               | 0.0004                                |
| tRNAs                                                      | 0.4123                   | [0.1863, 0.6585]                               | 0.0007                                |
| <i>Wolfe S. cerevisiae</i> – <i>K. waltii</i> breakpoints  |                          |                                                |                                       |
| Intercept                                                  | -1.1724                  | [-1.2818, -1.0640]                             | < 10 <sup>-15</sup>                   |
| Telomeric repeats                                          | -0.8004                  | [-14.074, -0.16106]                            | 0.0995                                |
| Telomeres                                                  | -13.149                  | [-14.372, -12.086]                             | 0.9572                                |
| hcARSs                                                     | 0.2704                   | [0.02965, 0.48843]                             | 0.0213                                |
| tRNAs                                                      | 0.6416                   | [0.39997, 0.90655]                             | < 10 <sup>-6</sup>                    |

## ***References***

- Admire A, et al. 2006. Cycles of chromosome instability are associated with a fragile site and are increased by defects in DNA replication and checkpoint controls in yeast. *Genes Dev.* 20:159-173.
- Aladjem MI, Koltin Y and Lavi S. 1988. Enhancement of copper resistance and CupI amplification in carcinogen-treated yeast cells. *Mol Gen Genet.* 211:88-94.
- Argueso JL, et al. 2008. Double-strand breaks associated with repetitive DNA can reshape the genome. *Proc Natl Acad Sci U S A.* 105:11845-11850.
- Bond U, Neal C, Donnelly D and James TC. 2004. Aneuploidy and copy number breakpoints in the genome of lager yeasts mapped by microarray hybridisation. *Curr Genet.* 45:360-370.
- Borde V, et al. 2004. Association of Mre11p with double-strand break sites during yeast meiosis. *Mol Cell.* 13:389-401.
- Brown CJ, Todd KM and Rosenzweig RF. 1998. Multiple duplications of yeast hexose transport genes in response to selection in a glucose-limited environment. *Mol Biol Evol.* 15:931-942.
- Byrne KP and Wolfe KH. 2005. The Yeast Gene Order Browser: combining curated homology and syntenic context reveals gene fate in polyploid species. *Genome Res.* 15:1456-1461.
- Chen C and Kolodner RD. 1999. Gross chromosomal rearrangements in *Saccharomyces cerevisiae* replication and recombination defective mutants. *Nat Genet.* 23:81-85.
- Degtyareva NP, Chen L, Mieczkowski P, Petes TD and Doetsch PW. 2008. Chronic oxidative DNA damage due to DNA repair defects causes chromosomal instability in *Saccharomyces cerevisiae*. *Mol Cell Biol.* 28:5432-5445.
- Dunham MJ, et al. 2002. Characteristic genome rearrangements in experimental evolution of *Saccharomyces cerevisiae*. *Proc Natl Acad Sci U S A.* 99:16144-16149.
- Dunn B, Levine RP and Sherlock G. 2005. Microarray karyotyping of commercial wine yeast strains reveals shared, as well as unique, genomic signatures. *BMC Genomics.* 6:53.
- Fischer G, James SA, Roberts IN, Oliver SG and Louis EJ. 2000. Chromosomal evolution in *Saccharomyces*. *Nature.* 405:451-454.
- Gordon JL, Byrne KP and Wolfe KH. 2009. Additions, losses, and rearrangements on the evolutionary route from a reconstructed ancestor to the modern *Saccharomyces cerevisiae* genome. *PLoS Genet.* 5:e1000485.
- Gresham D, et al. 2008. The repertoire and dynamics of evolutionary adaptations to controlled nutrient-limited environments in yeast. *PLoS Genet.* 4:e1000303.

- Hall C, Brachat S and Dietrich FS. 2005. Contribution of horizontal gene transfer to the evolution of *Saccharomyces cerevisiae*. *Eukaryot Cell*. 4:1102-1115.
- Huang D and Koshland D. 2003. Chromosome integrity in *Saccharomyces cerevisiae*: the interplay of DNA replication initiation factors, elongation factors, and origins. *Genes Dev*. 17:1741-1754.
- Hwang JY, et al. 2008. Smc5-Smc6 complex suppresses gross chromosomal rearrangements mediated by break-induced replications. *DNA Repair (Amst)*. 7:1426-1436.
- James TC, Usher J, Campbell S and Bond U. 2008. Lager yeasts possess dynamic genomes that undergo rearrangements and gene amplification in response to stress. *Curr Genet*. 53:139-152.
- Kellis M, Birren BW and Lander ES. 2004. Proof and evolutionary analysis of ancient genome duplication in the yeast *Saccharomyces cerevisiae*. *Nature*. 428:617-624.
- Kellis M, Patterson N, Endrizzi M, Birren B and Lander ES. 2003. Sequencing and comparison of yeast species to identify genes and regulatory elements. *Nature*. 423:241-254.
- Kozul R, Caburet S, Dujon B and Fischer G. 2004. Eucaryotic genome evolution through the spontaneous duplication of large chromosomal segments. *Embo J*. 23:234-243.
- Lemoine FJ, Degtyareva NP, Kokoska RJ and Petes TD. 2008. Reduced levels of DNA polymerase delta induce chromosome fragile site instability in yeast. *Mol Cell Biol*. 28:5359-5368.
- Lemoine FJ, Degtyareva NP, Lobachev K and Petes TD. 2005. Chromosomal translocations in yeast induced by low levels of DNA polymerase a model for chromosome fragile sites. *Cell*. 120:587-598.
- Maxwell PH and Curcio MJ. 2007. Retrosequence formation restructures the yeast genome. *Genes Dev*. 21:3308-3318.
- McCune HJ, et al. 2008. The temporal program of chromosome replication: genomewide replication in *clb5[Delta]* *Saccharomyces cerevisiae*. *Genetics*. 180:1833-1847.
- Nieduszynski CA, Hiraga S, Ak P, Benham CJ and Donaldson AD. 2007. OriDB: a DNA replication origin database. *Nucleic Acids Res*. 35:D40-46.
- Payen C, Kozul R, Dujon B and Fischer G. 2008. Segmental duplications arise from Pol32-dependent repair of broken forks through two alternative replication-based mechanisms. *PLoS Genet*. 4:e1000175.
- Perez-Ortin JE, Querol A, Puig S and Barrio E. 2002. Molecular characterization of a chromosomal rearrangement involved in the adaptive evolution of yeast strains. *Genome Res*. 12:1533-1539.



- Rachidi N, Barre P and Blondin B. 1999. Multiple Ty-mediated chromosomal translocations lead to karyotype changes in a wine strain of *Saccharomyces cerevisiae*. *Mol Gen Genet*. 261:841-850.
- Schacherer J, de Montigny J, Welcker A, Souciet JL and Potier S. 2005. Duplication processes in *Saccharomyces cerevisiae* haploid strains. *Nucleic Acids Res*. 33:6319-6326.
- Schacherer J, Tourrette Y, Potier S, Souciet JL and de Montigny J. 2007. Spontaneous duplications in diploid *Saccharomyces cerevisiae* cells. *DNA Repair (Amst)*. 6:1441-1452.
- Schacherer J, Tourrette Y, Souciet JL, Potier S and De Montigny J. 2004. Recovery of a function involving gene duplication by retroposition in *Saccharomyces cerevisiae*. *Genome Res*. 14:1291-1297.
- Tourrette Y, et al. 2007. Spontaneous deletions and reciprocal translocations in *Saccharomyces cerevisiae*: influence of ploidy. *Mol Microbiol*. 64:382-395.
- Umez K, Hiraoka M, Mori M and Maki H. 2002. Structural analysis of aberrant chromosomes that occur spontaneously in diploid *Saccharomyces cerevisiae*: retrotransposon Ty1 plays a crucial role in chromosomal rearrangements. *Genetics*. 160:97-110.
- VanHulle K, et al. 2007. Inverted DNA repeats channel repair of distant double-strand breaks into chromatid fusions and chromosomal rearrangements. *Mol Cell Biol*. 27:2601-2614.

B.

Figure S1

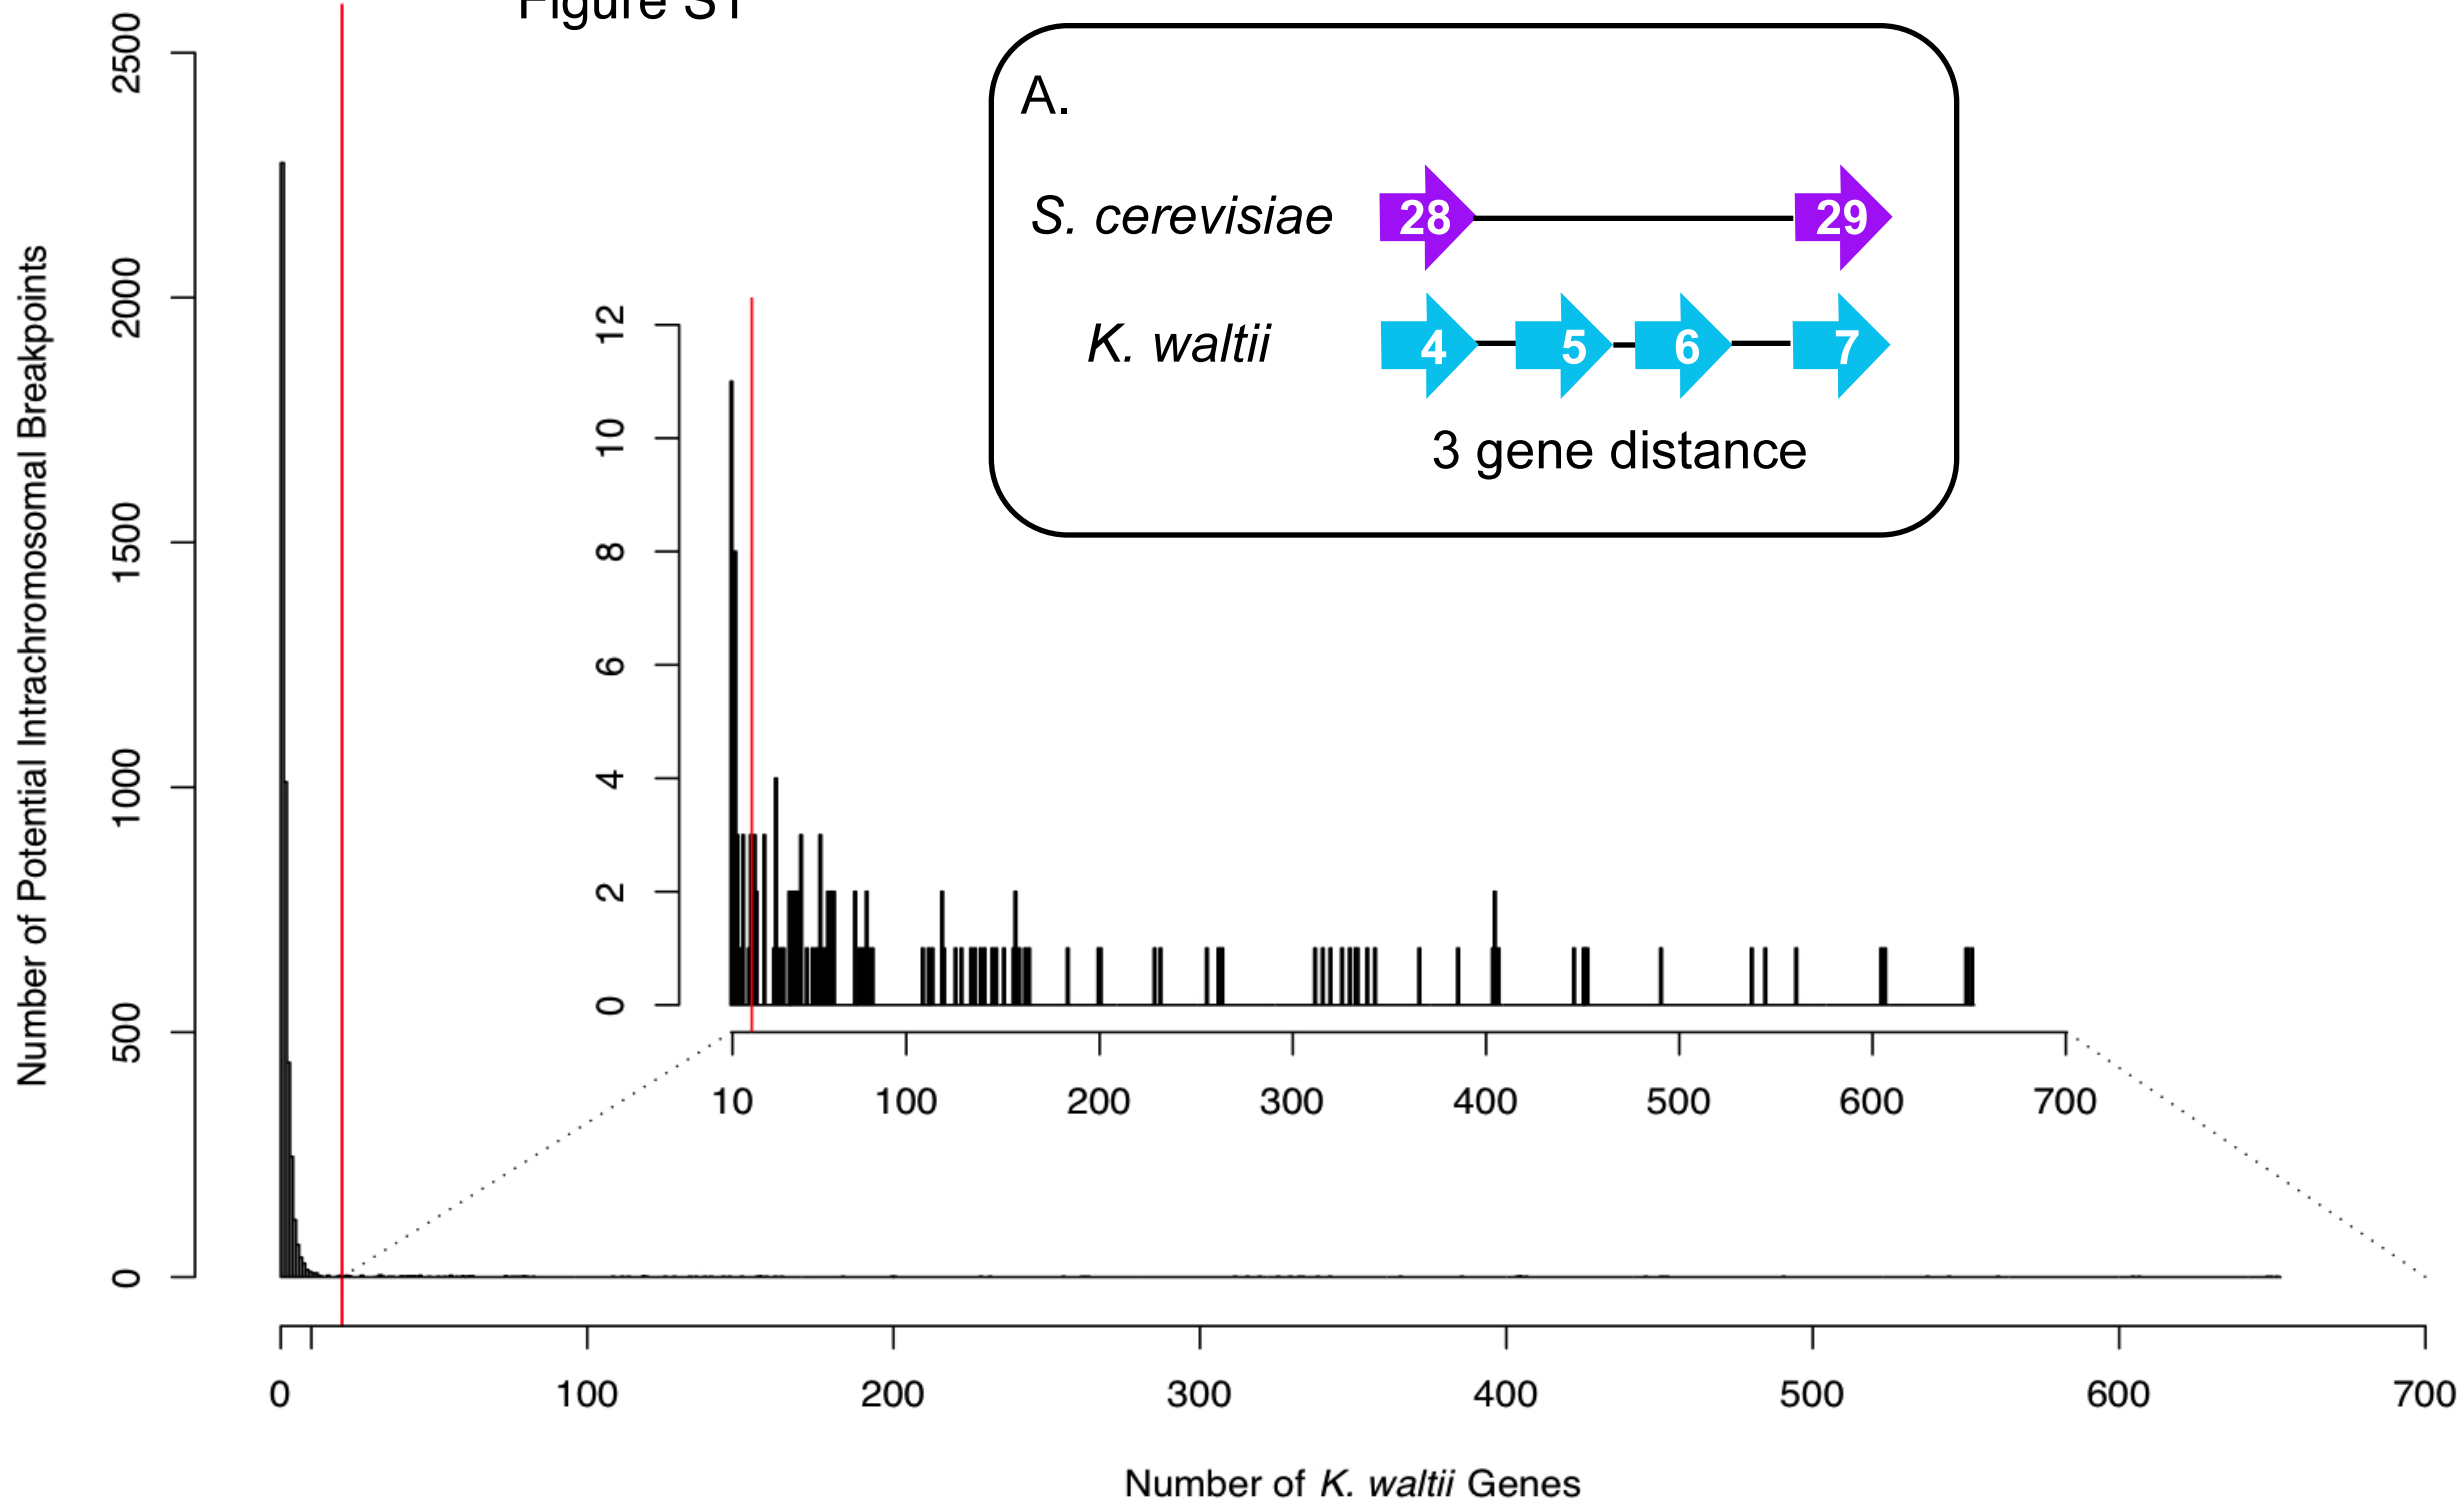

Figure S2

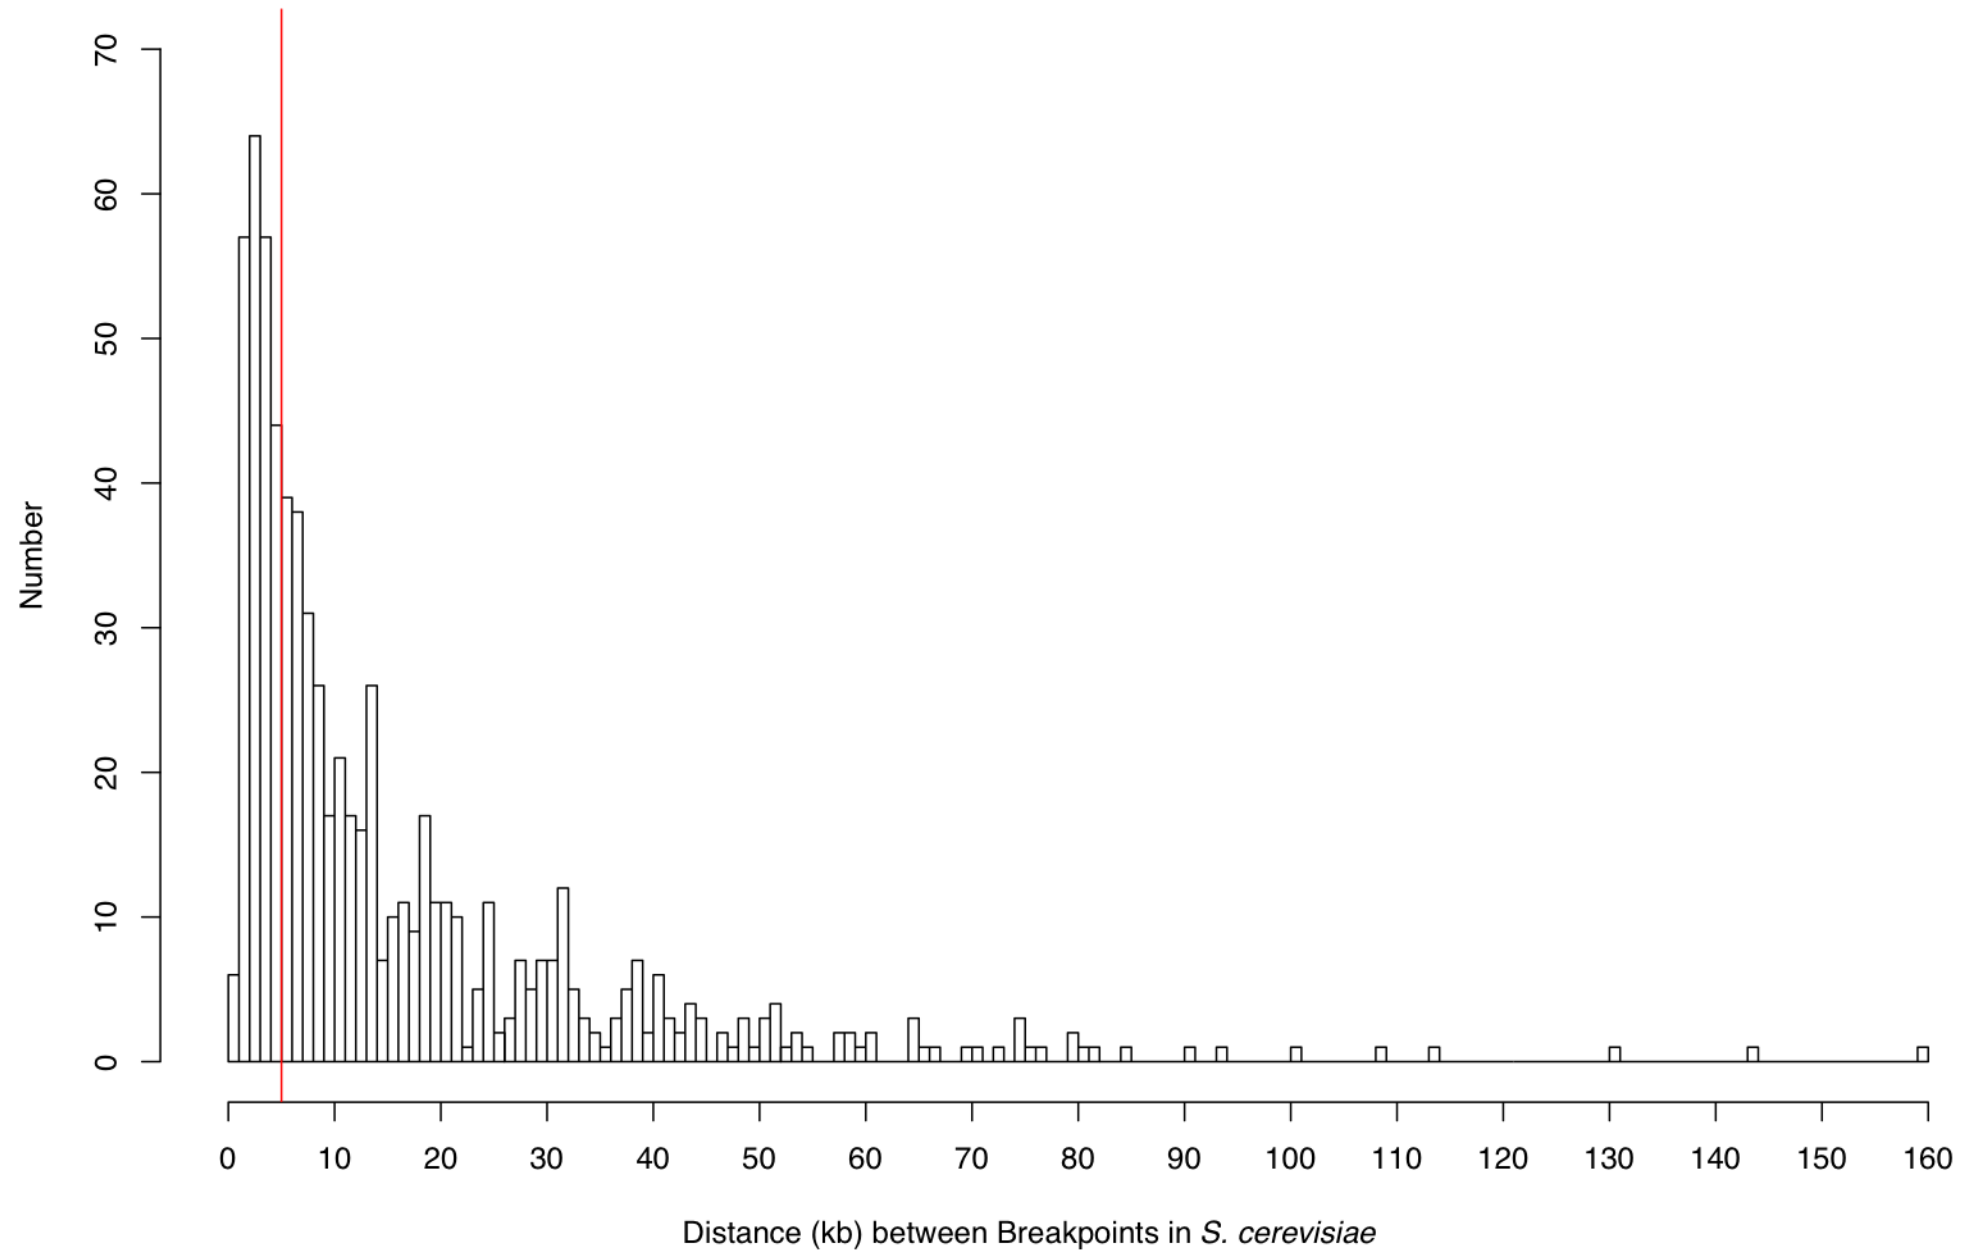

Figure S3

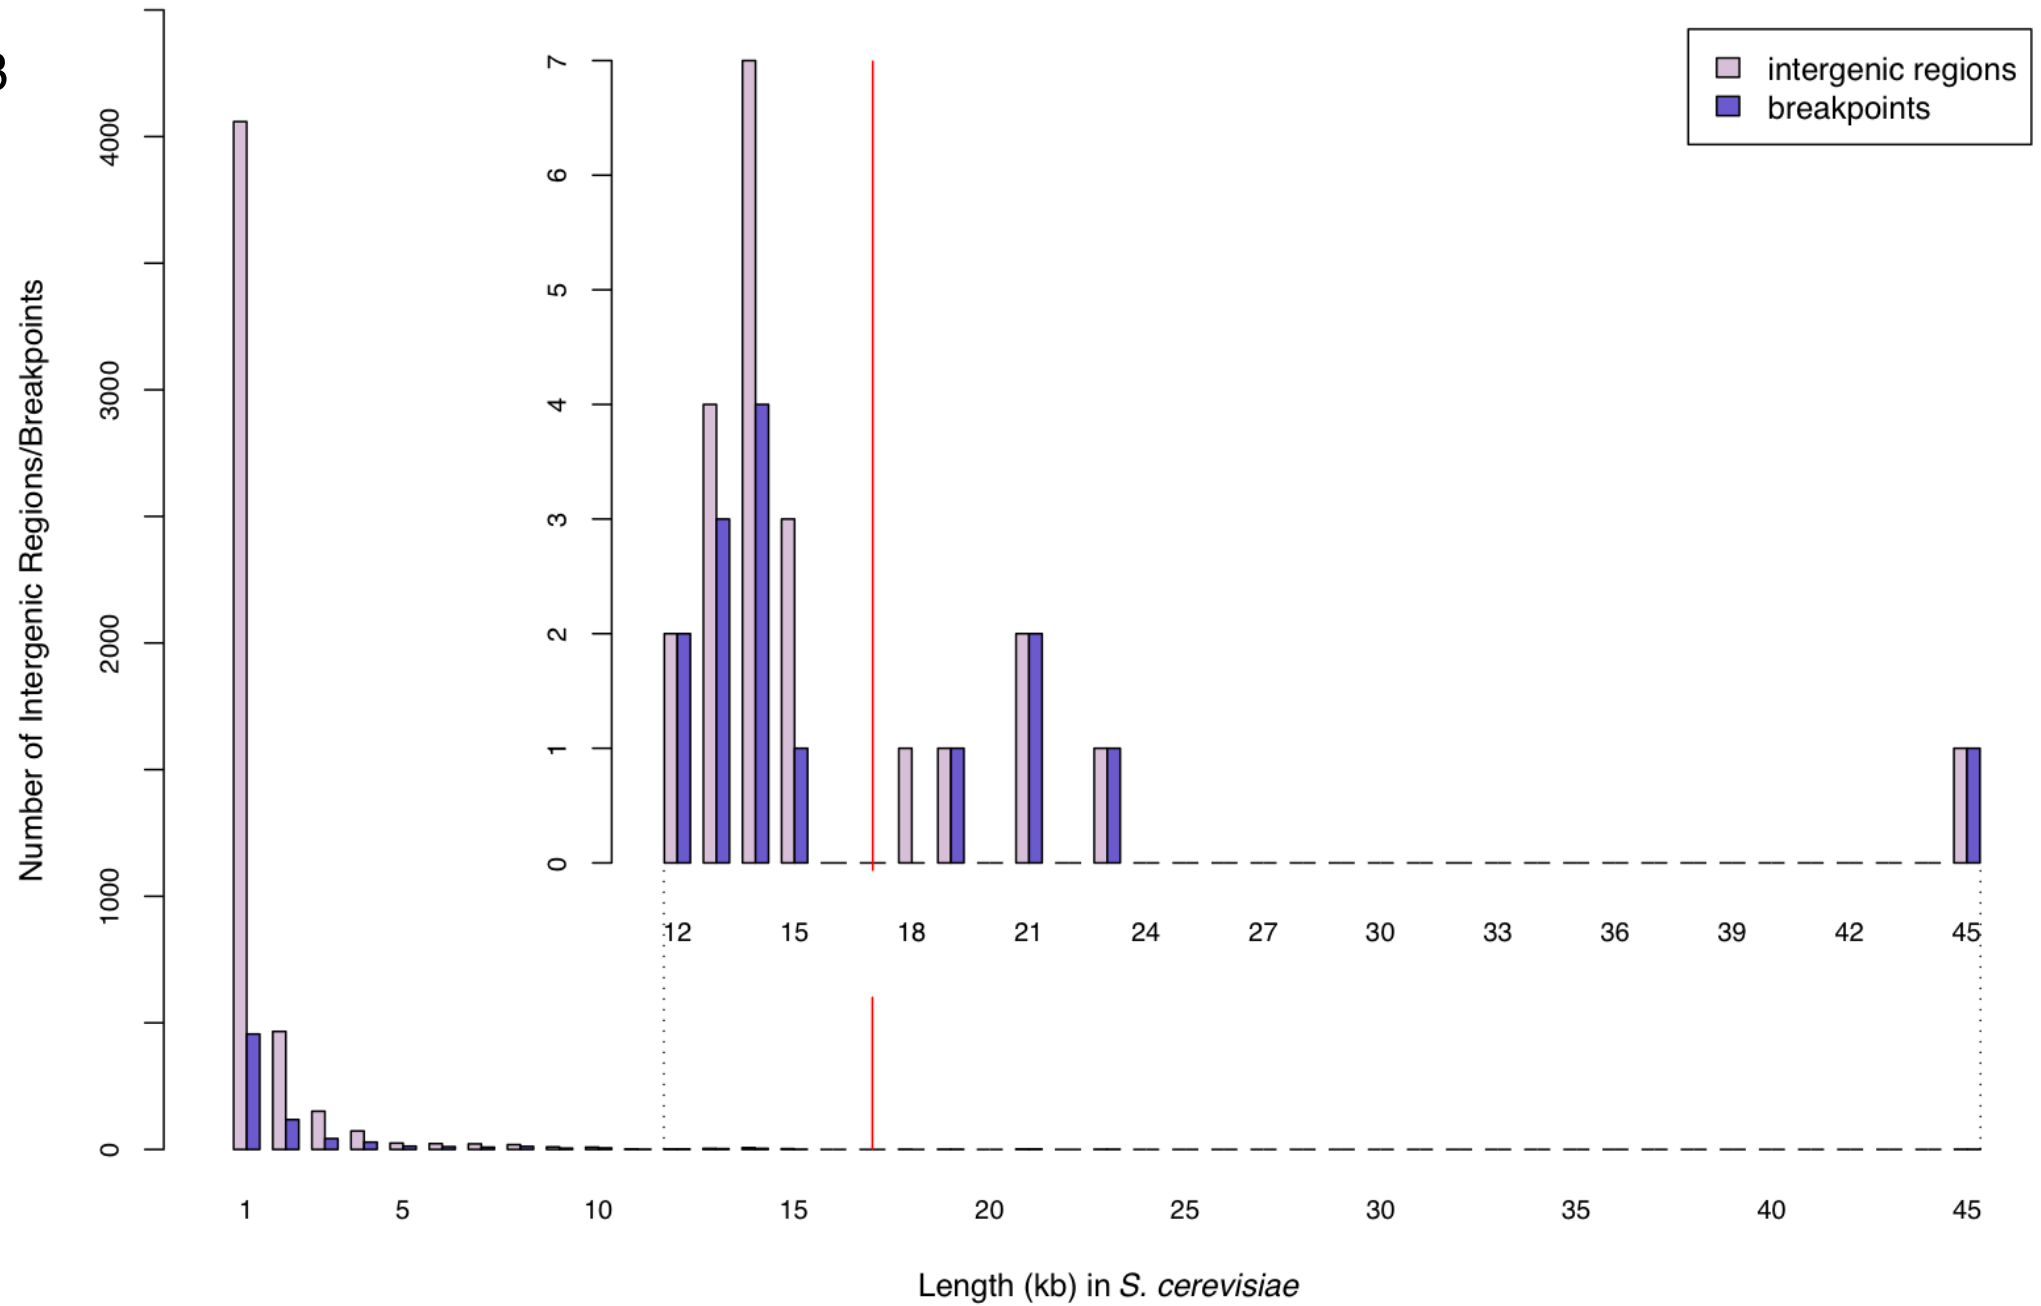

Supplement: evp034_1.pdf [file evp034_1.pdf]
